# Supplementary material
Source: PubMed Central journal article supplement (PMC6923996)
Supplement: NIHMS1544314-supplement-3.pdf [file NIHMS1544314-supplement-3.pdf]

**Supplemental Table 1:** sgRNA sequences for *MUT* and *PCCA*. The upstream PAM sequences, not included in the guide sequence, are highlighted in red.

| Gene        | Exon | sgRNA1 (5' – 3')           | sgRNA2(5' – 3')            |
|-------------|------|----------------------------|----------------------------|
| <i>MUT</i>  | 5    | CACACTGTCAGACATCTGGA (TGG) | CCTAAAAACTCAAATCTCT (TCT)  |
| <i>PCCA</i> | 12   | TGGGACCGTGGAGTTCCTTG (TGG) | CCAGAGCAGTAAAATATTCC (TCT) |

**Supplemental Table 2:** Primer sequences for Surveyor Assay screening and sequencing of edited clones.

| Gene        | Exon | Forward Primer (5' – 3')    | Reverse Primer (5' – 3')   |
|-------------|------|-----------------------------|----------------------------|
| <i>MUT</i>  | 5    | TGTACGTGCACTGATCTTAATTC     | TTAACCACCAGAGGGAGACAA      |
| <i>PCCA</i> | 12   | AAAGTTGACTTATTTGAGCATGTTATG | GATGTCTTAGCACAAAGCATAAAAAC |

**Supplemental Table 3:** qRT-PCR Primer sequences for mRNA expression in HEK293 cells.

| Gene          | Forward (5' – 3')     | Reverse (5' – 3')       |
|---------------|-----------------------|-------------------------|
| <i>SLC3A2</i> | CTGGTGCCGTGGTCATAATC  | TGCTCAGGTAATCGAGACGCC   |
| <i>SLC7A5</i> | TCATCATCCGGCCTTCATCG  | TCACGCTGTAGCAGTTCACG    |
| <i>PSAT1</i>  | TCTACGTCATGGGCTTGGTTC | TCTTGCTTCTATTTTGGGGCTC  |
| <i>CBS</i>    | GGGTCCCCAGAGGATAAGGA  | GGGGTGTCCCCGATTTTCTT    |
| <i>ASNS</i>   | TGTTGGATGGTGTGTTTGCAT | TCGCGGAGTGCTTCAATGTA    |
| <i>S18</i>    | CGGCGACGACCCATTCGAAC  | GAATCGAACCCTGATTCCCCGTC |

**Supplemental Table 4A:** Significantly enriched GO terms and KEGG pathways identified by DAVID analysis of proteins with reduced abundance in fibroblast cells from individuals with methylmalonic acidemia (MMA).

| <b>Functional Annotation of Proteins with Reduced Abundance<br/>in MMA fibroblast cells vs Control</b> |                |
|--------------------------------------------------------------------------------------------------------|----------------|
| <b>Term</b>                                                                                            | <b>P-Value</b> |
| <b>GO Terms, Biological Process</b>                                                                    |                |
| extracellular matrix disassembly                                                                       | 1.00E-04       |
| oxidation-reduction process                                                                            | 2.70E-04       |
| cyclooxygenase pathway                                                                                 | 1.60E-03       |
| autophagy                                                                                              | 9.10E-03       |
| response to vitamin B1                                                                                 | 1.20E-02       |
| positive regulation of reactive oxygen species metabolic process                                       | 1.40E-02       |
| response to hypoxia                                                                                    | 2.10E-02       |
| negative regulation of extracellular matrix disassembly                                                | 2.40E-02       |
| negative regulation of cell proliferation involved in contact inhibition                               | 2.40E-02       |
| renal absorption                                                                                       | 2.40E-02       |
| cell-cell adhesion                                                                                     | 2.60E-02       |
| muscle contraction                                                                                     | 2.80E-02       |
| response to oxidative stress                                                                           | 3.00E-02       |
| positive regulation of adaptive immune response                                                        | 3.00E-02       |
| proteolysis                                                                                            | 3.40E-02       |
| proteolysis involved in cellular protein catabolic process                                             | 3.50E-02       |
| doxorubicin metabolic process                                                                          | 4.80E-02       |
| response to selenium ion                                                                               | 4.80E-02       |
| daunorubicin metabolic process                                                                         | 4.80E-02       |
| response to calcium ion                                                                                | 4.90E-02       |
| <b>KEGG Pathways</b>                                                                                   |                |
| Pyruvate metabolism                                                                                    | 3.80E-03       |
| Valine, leucine and isoleucine degradation                                                             | 6.00E-03       |
| Amino sugar and nucleotide sugar metabolism                                                            | 6.40E-03       |
| Arachidonic acid metabolism                                                                            | 1.30E-02       |
| Histidine metabolism                                                                                   | 1.40E-02       |
| Metabolic pathways                                                                                     | 2.60E-02       |
| Pentose and glucuronate interconversions                                                               | 3.30E-02       |
| Tryptophan metabolism                                                                                  | 4.00E-02       |
| Fatty acid degradation                                                                                 | 4.80E-02       |

**Supplemental Table 4B:** Significantly enriched GO terms and KEGG pathways identified by DAVID analysis of proteins with increased abundance in fibroblast cells from individuals with methylmalonic acidemia (MMA).

| <b>Functional Annotation of Proteins with Increased Abundance<br/>in MMA fibroblast cells vs Control</b> |                |
|----------------------------------------------------------------------------------------------------------|----------------|
| <b>Term</b>                                                                                              | <b>P-Value</b> |
| <b>GO Terms, Biological Process</b>                                                                      |                |
| cellular amino acid biosynthetic process                                                                 | 1.10E-04       |
| response to virus                                                                                        | 7.50E-03       |
| negative regulation of cell proliferation                                                                | 1.40E-02       |
| hydrogen sulfide biosynthetic process                                                                    | 1.40E-02       |
| nuclear transport                                                                                        | 1.80E-02       |
| transsulfuration                                                                                         | 1.80E-02       |
| establishment of integrated proviral latency                                                             | 2.90E-02       |
| organ morphogenesis                                                                                      | 4.40E-02       |
| neutral amino acid transport                                                                             | 4.60E-02       |
| <b>KEGG Pathways</b>                                                                                     |                |
| Biosynthesis of amino acids                                                                              | 2.30E-03       |
| Cysteine and methionine metabolism                                                                       | 8.20E-03       |
| Metabolic pathways                                                                                       | 2.30E-02       |
| Biosynthesis of antibiotics                                                                              | 4.00E-02       |
| Glycerophospholipid metabolism                                                                           | 4.60E-02       |

**Supplemental Table 4C:** Significantly enriched GO terms and KEGG pathways identified by DAVID analysis of proteins with reduced abundance in fibroblast cells from individuals with propionic acidemia (PA).

| <b>Functional Annotation of Proteins with Reduced Abundance<br/>in PA fibroblast cells vs Control</b> |                |
|-------------------------------------------------------------------------------------------------------|----------------|
| <b>Term</b>                                                                                           | <b>P-Value</b> |
| <b>GO Terms, Biological Process</b>                                                                   |                |
| extracellular matrix disassembly                                                                      | 8.10E-05       |
| response to hypoxia                                                                                   | 5.10E-04       |
| oxidation-reduction process                                                                           | 2.40E-03       |
| positive regulation of osteoblast differentiation                                                     | 5.20E-03       |
| branched-chain amino acid catabolic process                                                           | 5.40E-03       |
| protein localization                                                                                  | 5.40E-03       |
| memory                                                                                                | 5.70E-03       |
| response to cadmium ion                                                                               | 9.30E-03       |
| angiogenesis                                                                                          | 9.90E-03       |
| response to vitamin B1                                                                                | 1.20E-02       |
| positive regulation of I-kappaB kinase/NF-kappaB signaling                                            | 1.50E-02       |
| positive regulation of vasoconstriction                                                               | 1.50E-02       |
| apoptotic process                                                                                     | 1.80E-02       |
| protein homooligomerization                                                                           | 2.00E-02       |
| negative regulation of cell proliferation involved in contact inhibition                              | 2.30E-02       |
| valine catabolic process                                                                              | 2.30E-02       |
| negative regulation of extracellular matrix disassembly                                               | 2.30E-02       |
| negative regulation of protein ubiquitination                                                         | 2.40E-02       |
| response to oxidative stress                                                                          | 2.70E-02       |
| proteolysis                                                                                           | 2.70E-02       |
| cellular response to lipopolysaccharide                                                               | 2.80E-02       |
| peripheral nervous system axon regeneration                                                           | 2.90E-02       |
| positive regulation of adaptive immune response                                                       | 2.90E-02       |
| cellular response to amino acid stimulus                                                              | 3.10E-02       |
| proteolysis involved in cellular protein catabolic process                                            | 3.20E-02       |
| response to drug                                                                                      | 3.30E-02       |
| leukocyte migration                                                                                   | 3.50E-02       |
| defense response to Gram-negative bacterium                                                           | 4.10E-02       |
| response to calcium ion                                                                               | 4.50E-02       |
| response to mechanical stimulus                                                                       | 4.70E-02       |
| <b>KEGG Pathways</b>                                                                                  |                |
| Proteoglycans in cancer                                                                               | 1.40E-04       |
| Valine, leucine and isoleucine degradation                                                            | 4.60E-04       |
| Glyoxylate and dicarboxylate metabolism                                                               | 1.90E-02       |
| Protein digestion and absorption                                                                      | 3.10E-02       |

|                        |          |
|------------------------|----------|
| Pyruvate metabolism    | 3.90E-02 |
| Metabolic Pathways     | 4.50E-02 |
| Fatty acid degradation | 4.60E-02 |

**Supplemental Table 4D:** Significantly enriched GO terms and KEGG pathways identified by DAVID analysis of proteins with increased abundance in fibroblast cells from individuals with propionic acidemia (PA).

| <b>Functional Annotation of Proteins with Increased Abundance<br/>in PA fibroblast cells vs Control</b> |                |
|---------------------------------------------------------------------------------------------------------|----------------|
| <b>Term</b>                                                                                             | <b>P-Value</b> |
| <b>GO Terms, Biological Process</b>                                                                     |                |
| extracellular matrix organization                                                                       | 3.90E-04       |
| cell adhesion                                                                                           | 3.90E-04       |
| cellular amino acid biosynthetic process                                                                | 7.10E-03       |
| glycosaminoglycan metabolic process                                                                     | 8.80E-03       |
| cell migration                                                                                          | 1.00E-02       |
| cell-cell adhesion                                                                                      | 1.00E-02       |
| amino acid transport                                                                                    | 1.30E-02       |
| adherens junction organization                                                                          | 1.40E-02       |
| muscle contraction                                                                                      | 1.50E-02       |
| collagen fibril organization                                                                            | 1.60E-02       |
| hydrogen sulfide biosynthetic process                                                                   | 1.90E-02       |
| transsulfuration                                                                                        | 2.40E-02       |
| heterophilic cell-cell adhesion via plasma membrane cell adhesion molecules                             | 2.50E-02       |
| cerebral cortex development                                                                             | 3.10E-02       |
| regulation of cell shape                                                                                | 3.10E-02       |
| elastic fiber assembly                                                                                  | 3.40E-02       |
| cardiac muscle fiber development                                                                        | 3.80E-02       |
| <b>KEGG Pathways</b>                                                                                    |                |
| Focal Adhesion                                                                                          | 3.30E-02       |
| Vascular smooth muscle contraction                                                                      | 3.30E-02       |
| Biosynthesis of antibiotics                                                                             | 3.60E-02       |
| Metabolic pathways                                                                                      | 4.80E-02       |
| Cell adhesion molecules (CAMs)                                                                          | 5.10E-02       |
| Biosynthesis of amino acids                                                                             | 7.10E-02       |
